1 **A short-form paper for Antimicrobial Agents and Chemotherapy (AAC)**

2

3 **Title:** Isavuconazole therapeutic drug monitoring associated to a pharmacogenetic exploration is far from  
4 being a pharmacologists' whim.

5

6 **Authors :** L Darnaud<sup>a</sup>, F Lamoureux<sup>b</sup>, C Godet<sup>c</sup>, S Pontier<sup>d</sup>, A Debard<sup>c</sup>, N Venisse<sup>f</sup>, P Martins<sup>g</sup>, D Concordet<sup>h</sup>,  
7 P Gandia<sup>a,h</sup>.

8

9 <sup>a</sup>Laboratoire de Pharmacocinétique et Toxicologie, CHU de Toulouse - Toulouse (France); <sup>b</sup>Laboratoire de  
10 Pharmacologie, Toxicologie, Pharmacogénétique, CHU de Rouen - Rouen (France); <sup>c</sup>Service de Maladies  
11 Infectieuses, CHU de Poitiers-Poitiers (France); <sup>d</sup>Service de Pneumologie, CHU Larrey -  
12 Toulouse (France); <sup>e</sup>Service des Maladies Infectieuses et Tropicales, CHU de Toulouse -  
13 Toulouse (France); <sup>f</sup>Laboratoire de Toxicologie et Pharmacocinétique, CHU de Poitiers -  
14 Poitiers (France); <sup>g</sup>Service de Pneumologie, CHU Poitiers - Poitiers (France); <sup>h</sup>INTHERES, Université de  
15 Toulouse, INRA, ENVT - Toulouse (France)

16

17 **\*Corresponding author:** Tel: +33(0)567690383; Fax: +33(0)567690384; E-mail: [gandia.p@chu-toulouse.fr](mailto:gandia.p@chu-toulouse.fr)

18

19 **Key words:** isavuconazole, therapeutic drug monitoring, pharmacogenetics

20

21 **ABSTRACT**

22 Isavuconazole is a new antifungal prodrug to treat invasive aspergillosis and mucormycosis, theoretically not  
23 requiring drug monitoring. However, we reported 4 clinical cases with toxic concentrations. Based on Desai's  
24 population pharmacokinetic model, we estimated patients' kinetic profile. Clearance was abnormally low,  
25 likely related to CYP3A4/5 polymorphisms. Thus, we recommend to collect blood sample just before the first  
26 maintenance dose to estimate pharmacokinetic profile and individualized dose. For patients presenting high  
27 concentrations, pharmacogenetics can be done.

28 Recently, Stott et al. [1] mentioned that “the novel broad-spectrum azole drug isavuconazole does not  
29 currently appear to require TDM but 'real-world' data are awaited and TDM could be considered in selected  
30 clinical cases”. It did not take very long to confirm these proposals and even go further in the  
31 recommendations.

32 Isavuconazole is a new antifungal prodrug approved in the USA and Europe for the treatment of invasive  
33 aspergillosis and mucormycosis in adults. The recommended dose is 200 mg (IV or PO) every 8 h for 48 h,  
34 followed by 200 mg once daily for maintenance dose applied 12–24 h after the last loading dose. The median  
35 trough plasma concentrations of isavuconazole (i.e. value determined just before drug readministration) at  
36 steady state (> 7 days of treatment) in patients who received the drug in the SECURE and VITAL trials [2-3],  
37 were 3–4 µg/mL. Recently, we observed 4 cases of unexpected high concentrations a few days after the last  
38 loading dose, without obvious explaining factors (no drug-drug interactions and no previous hepatic injury).  
39 For 2 patients, these high levels were concomitant with adverse effects (patellar tendinopathy and discomfort,  
40 respectively).

41  
42 Isavuconazole plasma concentrations were determined using a validated chromatographic technique according  
43 to ISO15189 standards. Using the population pharmacokinetic model published by Desai et al [4], firstly we  
44 simulated 50000 pharmacokinetic profiles of isavuconazole for the recommended loading (200 mg/8h x 6)  
45 and maintenance doses (200 mg/day). Secondly, for each patient, we computed the Empirical Bayes Estimates  
46 (EBE) of the pharmacokinetic parameters (Table 1) and deduced the most likely kinetic profile (Fig. 1-4).  
47 Because these patients were extremes with respect to Desai’s model, their EBE’s where computed using an  
48 individual parameter distribution with heavier tails than the classical multidimensional log-normal  
49 distribution.

50 As isavuconazole is mainly metabolized by hepatic CYP3A4 and 3A5 [5-6], a pharmacogenetic exploration  
51 of *CYP3A4*\*22 (rs35599367) and *CYP3A5*\*3 (rs776746) polymorphisms, likely to explain low isavuconazole  
52 metabolism [7], was performed in these patients by real-time PCR.

53 This pharmacokinetic-pharmacogenetic exploration was routinely done as part of the hospital care of patients  
54 according to the regulations applied in France (patient's informed consent for genotyping).

55

56 For all patients, pharmacokinetic parameters were different from the median values (clearance 2.36 L/h,  
57 peripheral distribution volume 241.28 L, elimination half-life 90.57 h) reported by Desai [4] and in particular  
58 the clearance that was systematically lower (Table 1). In accordance with clinicians, an individualized dose  
59 adjustment could be proposed for two patients (Fig.3 and 4, Table 1) and the therapeutic drug monitoring  
60 confirmed in each case that the estimated values were very closed to the measured ones (2.54 µg/mL and 2.57  
61 µg/mL vs. 2.22 µg/mL and 2.55 µg/mL respectively for patient 3; 2.09 µg/mL vs. 1.83 µg/mL for patient 4).

62 Among the 4 patients studied, all of them carried the homozygous variant *CYP3A5\*3*, associated to a lack of  
63 *CYP3A5* activity, while 2 patients were homozygous for the *CYP3A4\*22*. In the Caucasian population, that  
64 is close to the Desai's study population (83.2% of Caucasian's and 16.8% of Asian's patients [4]), more than  
65 80-90% of patients possess *CYP3A5\*3* polymorphism [8]. Consequently, this information cannot explain  
66 over-exposure in our patients. On the contrary, *CYP3A4\*22* polymorphism is present in less than 8-10% of  
67 the Caucasian population [9]. Only 2 patients (50% of our population, patient 2 and 4) presented this  
68 polymorphism suggesting that other(s) explaining factor(s) is(are) likely elsewhere.

69

70 Based on these unexpected high concentrations and as previously suggested by Stott et al [1], we propose two  
71 recommendations. The first one consists in collecting a blood sample just before the first maintenance dose to  
72 estimate precociously the patient's likely kinetic profile using Desai's population pharmacokinetic model.  
73 Based on this profile, an individualized dose adjustment can be proposed as necessary. The second  
74 recommendation consists in screening *CYP3A4* and *3A5* genetic polymorphisms, besides those usually  
75 explored (*CYP3A4\*22* and *CYP3A5\*3*), including the nonfunctional alleles *CYP3A4\*17* (rs4987161) [10],  
76 *CYP3A5\*6* (rs10264272) [8] and *CYP3A5\*7* (rs76293380) [8] for patients presenting unexpected kinetic  
77 profiles. To date for patients in real life, too much sparse information concerning factors affecting  
78 pharmacokinetic profiles is available.

79

80 **ACKNOWLEDGEMENTS**

81 The authors did not receive any funding for this project: the data have been generated as part of the routine  
82 work.

83 Léa Darnaud received grants from Gilead outside the submitted work. Cendrine Godet received consultancy  
84 or speaker fees, travel support from Pfizer, Astellas, Gilead, Basilea, MSD, SOS Oxygene and ISIS Medical  
85 outside the submitted work. Sandrine Pontier received grants from Astrazeneca and Novartis outside the  
86 submitted work. Alexia Debard received grants from Janssen-Cilag and Gilead outside the submitted work.  
87 Nicolas Venisse received grants from Gilead and Janssen-Cilag outside the submitted work. Peggy Gandia  
88 has received grants from Gilead and MSD outside the submitted work. All other authors: none to declare.

89

## 90 REFERENCES

- 91 1. Stott KE and Hope WW. 2017. Therapeutic drug monitoring for invasive mould infections and disease:  
92 pharmacokinetics and pharmacodynamics considerations. *Journal of Antimicrobial Chemotherapy*. 72  
93 (Suppl 1): i12-i18
- 94 2. Maertens JA, Raad II, Marr KA, Patterson TF, Kontoyiannis DP, Cornely OA, Bow EJ, Rahav G,  
95 Neofytos D, Aoun M, Baddley JW, Giladi M, Heinz WJ, Herbrecht R, Hope W, Karthaus M, Lee DG,  
96 Lortholary O, Morrison VA, Oren I, Selleslag D, Shoham S, Thompson GR, Lee M, Maher RM,  
97 Schmitt-Hoffmann AH, Zeiher B and Ullmann AJ. 2016. Isavuconazole versus voriconazole for  
98 primary treatment of invasive mould disease caused by *Aspergillus* and other filamentous fungi  
99 (SECURE): a phase 3, randomized-controlled, non-inferiority trial. *The Lancet*. 387: 20-26 (760-769)
- 100 3. Marty FM, Ostrosky-Zeichner L, Cornely OA, Mullane KM, Perfect JR, Thompson GR, Alangaden  
101 GJ, Brown JM, Fredricks DN, Heinz WJ, Herbrecht R, Klimko N, Klyasova G, Maertens JA, Melinkeri  
102 SR, Oren I, Pappas PG, Ráčil Z, Rahav G, Santos R, Schwartz S, Vehreschild JJ, Young JH,  
103 Chetchotisakd P, Jaruratanasirikul S, Kanj SS, Engelhardt M, Kaufhold A, Ito M, Lee M, Sasse C,  
104 Maher RM, Zeiher B and Vehreschild MJGT. 2016. Isavuconazole treatment for mucormycosis: a  
105 single-arm open-label trial and case-control analysis. *The Lancet Infectious Diseases*. 16 (7): 828-837
- 106 4. Desai A, Kovanda L, Kowalski D, Lu Q, Townsend R, and Bonate PL. 2016. Population  
107 pharmacokinetics of isavuconazole from phase 1 and phase 3 (SECURE) trials in adults and target

- 108 attainment in patients with invasive infections due to aspergillus and other filamentous fungi.  
109 Antimicrob Agents Chemother. 60 5483-5491
- 110 5. Amsden JR and Gubbins PO. 2017. Pharmacogenomics of triazole antifungal agents: implications for  
111 safety, tolerability and efficacy. Expert Opinion on Drug Metabolism & Toxicology. 13 (11) :1135-  
112 1146
- 113 6. Townsend R, Dietz A, Hale C, Akhtar S, Kowalski D, Lademacher C, Lasseter K, Pearlman H,  
114 Rammelsberg D, Schmitt-Hoffmann A, Yamazaki T and Desai A. 2017. Pharmacokinetic evaluation  
115 of CYP3A4-mediated drug-drug interaction of isavuconazole with rifampin, ketoconazole,  
116 midazolam, and ethinyl estradiol/norethindrone in healthy adults. Clinical Pharmacology in Drug  
117 Development. 6 (10): 44–53
- 118 7. Gijzen VM, Schaik RH, Elens L, Soldin OP, Soldin SJ, Koren G and Wildt SN. 2013. CYP3A4\*22  
119 and CYP3A combined genotypes both correlate with tacrolimus disposition in pediatric heart transplant  
120 recipients. Pharmacogenomics. 14 (9): 1027-1036
- 121 8. Lamba J, Hebert JM, Schuetz EG, Klein TE and Altman RB. 2012. PharmGKB summary: very  
122 important pharmacogene information for CYP3A5. Pharmacogenetics and genomics. 22 (7): 555-558
- 123 9. Elens L, van Gelder T, Hesselink DA, Haufroid V and van Schaik RH. 2013. CYP3A4\*22: promising  
124 newly identified CYP3A4 variant allele for personalizing pharmacotherapy. Review.  
125 Pharmacogenomics. 14 (1): 47-62
- 126 10. Dai D, Tang J, Rose R, Hodgson E, Bienstock RJ, Mohrenweiser HW and Goldstein JA. 2001.  
127 Identification of variants of CYP3A4 and characterization of their abilities to metabolize testosterone  
128 and chlorpyrifos. The Journal of pharmacology and experimental therapeutics. 299 (3): 825-831  
129

## 130 **FIGURE LEGENDS**

131

132 **Fig. 1** Patient 1: Kinetic profile of isavuconazole. Median kinetic profile (curve in white), "extremes" profiles  
133 found in less than 5% and 95% of the population (black curves) and estimated kinetic profile of the patient  
134 (red curve); the black stars represent the measured concentrations.

135 **Fig. 2** Patient 2: Kinetic profile of isavuconazole. Median kinetic profile (curve in white), "extremes" profiles  
136 found in less than 5% and 95% of the population (black curves) and estimated kinetic profile of the patient  
137 (red curve); the black stars represent the measured concentrations.

138

139 **Fig. 3** Patient 3: Kinetic profile of isavuconazole. Median kinetic profile (curve in white), "extremes" profiles  
140 found in less than 5% and 95% of the population (black curves) and estimated kinetic profile of the patient  
141 (red curve); the black stars represent the measured concentrations while the green ones represent the estimated  
142 trough concentrations in case of individualized dosage adjustment and the therapeutic drug monitoring  
143 confirmed the estimated values.

144

145 **Fig. 4** Patient 4: Kinetic profile of isavuconazole. Median kinetic profile (curve in white), "extremes" profiles  
146 found in less than 5% and 95% of the population (black curves) and estimated kinetic profile of the patient  
147 (red curve); the black stars represent the measured concentrations while the green ones represent the estimated  
148 trough concentrations in case of individualized dosage adjustment and the therapeutic drug monitoring  
149 confirmed the estimated values.

150

151 **Table 1** Pharmacokinetic-pharmacogenetic exploration of isavuconazole for 4 French patients presenting high  
152 unexpected plasma levels: this exploration was done as part of the hospital care of patients.

153 *TDM* therapeutic drug monitoring

154 Column 1: patient's number

155 Column 2 to 7: Clinical information found for each patient

156 Column 8: Pharmacogenetic polymorphisms found for each patient according to a real-time PCR technique

157 Column 9 to 11: Pharmacokinetic parameters of isavuconazole estimated from Desai's population  
158 pharmacokinetic model [4] and plasma concentrations measured at different times depending on each patient

159 Column 12 to 13: The estimated trough concentrations in case of individualized dosage adjustment

160

161 Fig. 1

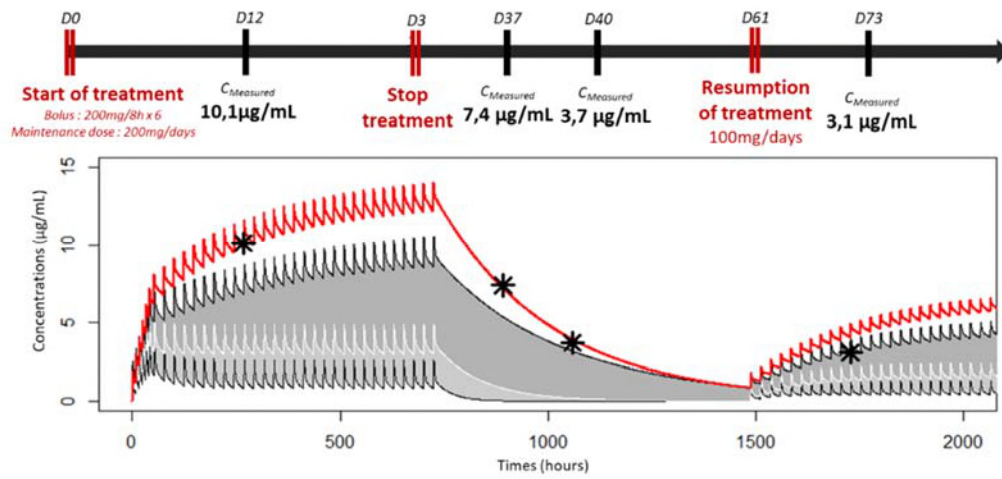

162

163 Fig. 2

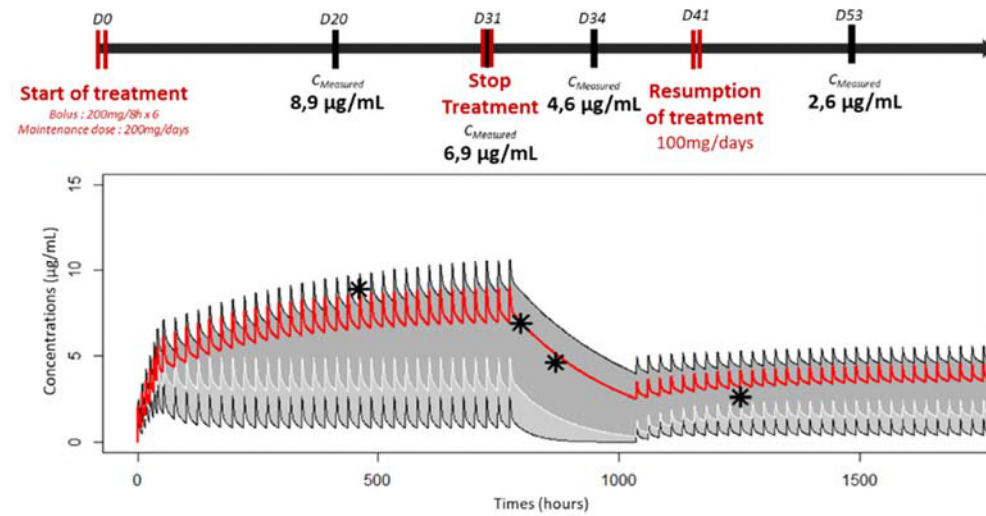

164

165 Fig. 3

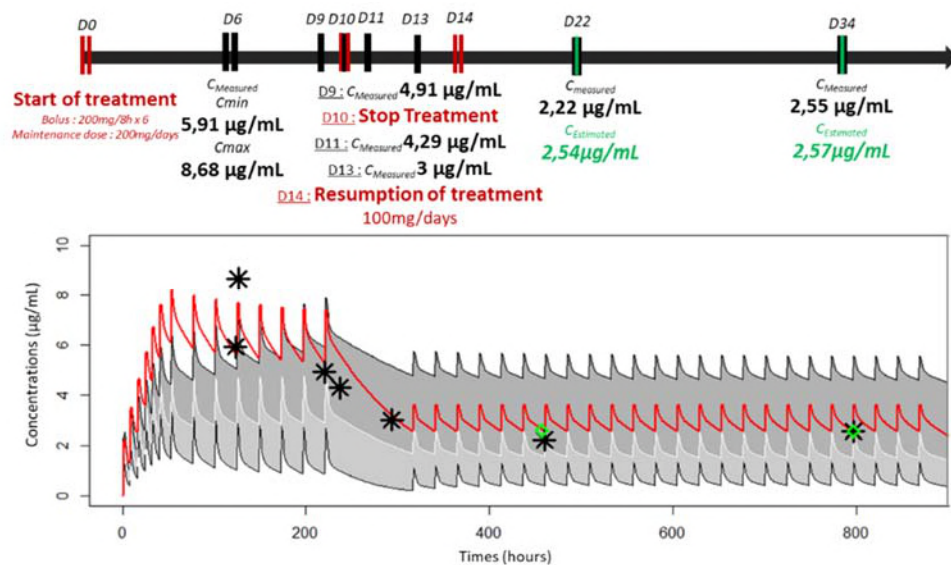

166

167 Fig. 4

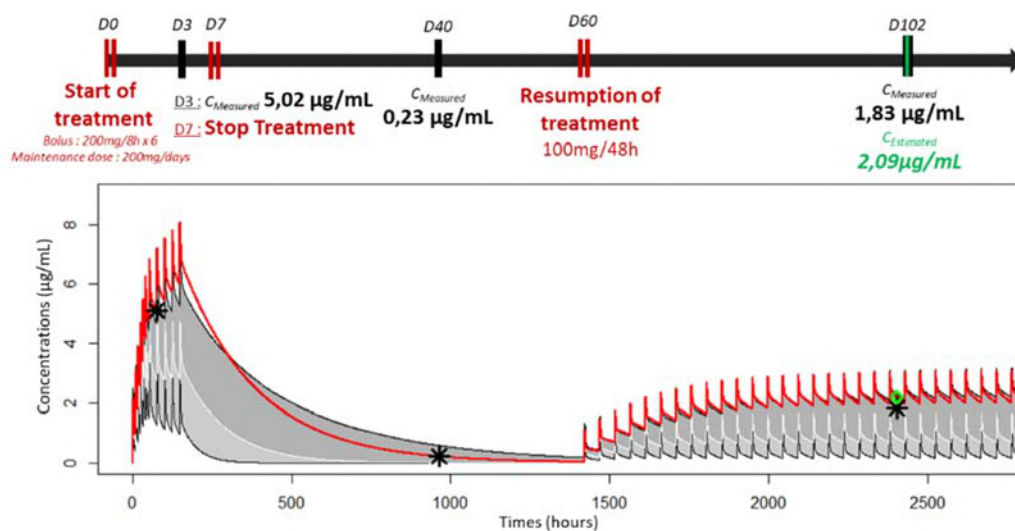

168

169

170



Table 1

| Patient | Clinical information |          |              |                          |                                                   |                       | Pharmacogenetics                  | Pharmacokinetic parameters |                         |               | Individualized dose adjustment |                                                                                          |
|---------|----------------------|----------|--------------|--------------------------|---------------------------------------------------|-----------------------|-----------------------------------|----------------------------|-------------------------|---------------|--------------------------------|------------------------------------------------------------------------------------------|
|         | Sex                  | Age      | Ethnic group | BMI (kg/m <sup>2</sup> ) | Coprescription                                    | Adverse effects       | CYP3A4*1<br>CYP3A5*3              | Clearance (L/h)            | Distribution volume (L) | Half-life (h) | New dose                       | TDM                                                                                      |
| 1       | Male                 | 70 years | Caucasian    | 20.8                     | Methotrexate<br>Prednisone<br>Esomeprazole        | Patellar tendinopathy | CYP3A4 : 1*/1*<br>CYP3A5 : 3*/3*  | 0.62                       | 120.23                  | 190.01        | 100 mg/24h                     |                                                                                          |
| 2       | Female               | 52 years | Caucasian    | 20.2                     | Prednisone                                        | Discomfort            | CYP3A4 : 1*/22*<br>CYP3A5 : 3*/3* | 1.09                       | 196.77                  | 161.28        | 100 mg/24h                     |                                                                                          |
| 3       | Male                 | 38 years | Caucasian    |                          | Prednisone                                        |                       | CYP3A4 : 1*/1*<br>CYP3A5 : 3*/3*  | 1.41                       | 88.14                   | 69.00         | 100 mg/24h                     | 2.22µg/mL measured for 2.54µg/mL estimated<br>2.55µg/mL measured for 2.57µg/mL estimated |
| 4       | Female               | 50 years | Caucasian    |                          | Levothyrox<br>Oxazepam<br>Zopiclone<br>Clonazepam |                       | CYP3A4 : 1*/22*<br>CYP3A5 : 3*/3* | 1.03                       | 141.23                  | 134.40        | 100 mg/48h                     | 1.83µg/mL measured for 2.09µg/mL estimated                                               |

Table 1

| Patient | Clinical information |          |              |                          |                                                   |                       | Pharmacogenetics                  | Pharmacokinetic parameters |                         |               | Individualized dose adjustment |                                                                                          |
|---------|----------------------|----------|--------------|--------------------------|---------------------------------------------------|-----------------------|-----------------------------------|----------------------------|-------------------------|---------------|--------------------------------|------------------------------------------------------------------------------------------|
|         | Sex                  | Age      | Ethnic group | BMI (kg/m <sup>2</sup> ) | Coprescription                                    | Adverse effects       | CYP3A4*1<br>CYP3A5*3              | Clearance (L/h)            | Distribution volume (L) | Half-life (h) | New dose                       | TDM                                                                                      |
| 1       | Male                 | 70 years | Caucasian    | 20.8                     | Methotrexate<br>Prednisone<br>Esomeprazole        | Patellar tendinopathy | CYP3A4 : 1*/1*<br>CYP3A5 : 3*/3*  | 0.62                       | 120.23                  | 190.01        | 100 mg/24h                     |                                                                                          |
| 2       | Female               | 52 years | Caucasian    | 20.2                     | Prednisone                                        | Discomfort            | CYP3A4 : 1*/22*<br>CYP3A5 : 3*/3* | 1.09                       | 196.77                  | 161.28        | 100 mg/24h                     |                                                                                          |
| 3       | Male                 | 38 years | Caucasian    |                          | Prednisone                                        |                       | CYP3A4 : 1*/1*<br>CYP3A5 : 3*/3*  | 1.41                       | 88.14                   | 69.00         | 100 mg/24h                     | 2.22µg/mL measured for 2.54µg/mL estimated<br>2.55µg/mL measured for 2.57µg/mL estimated |
| 4       | Female               | 50 years | Caucasian    |                          | Levothyrox<br>Oxazepam<br>Zopiclone<br>Clonazepam |                       | CYP3A4 : 1*/22*<br>CYP3A5 : 3*/3* | 1.03                       | 141.23                  | 134.40        | 100 mg/48h                     | 1.83µg/mL measured for 2.09µg/mL estimated                                               |

*TDM* therapeutic drug monitoring

Column 1: patient's number

Column 2 to 7: Clinical information found for each patient

Column 8: Pharmacogenetic polymorphisms found for each patient according to a real-time PCR technique

Column 9 to 11: Pharmacokinetic parameters of isavuconazole estimated from Desai's population pharmacokinetic model [4] and plasma concentrations measured at different times depending on each patient

Column 12 to 13: The estimated trough concentrations in case of individualized dosage adjustment

Fig. 1

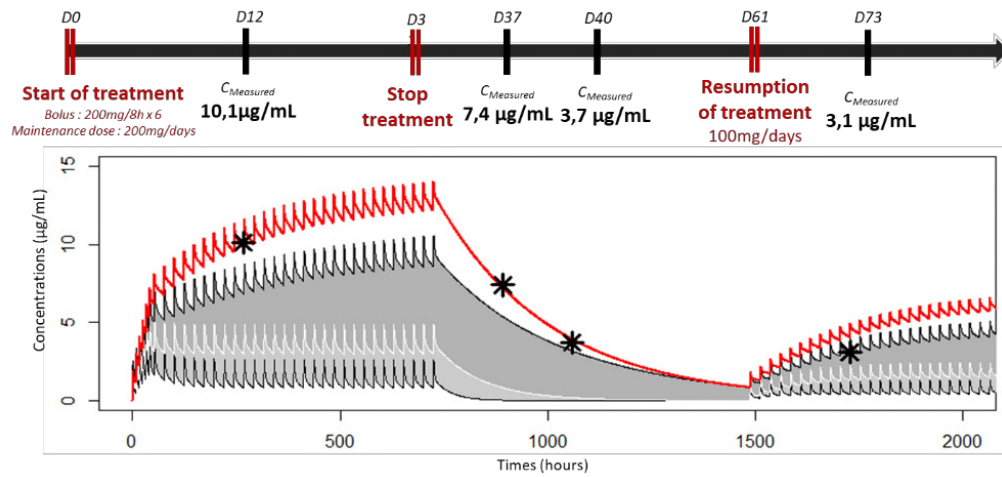

Fig. 2

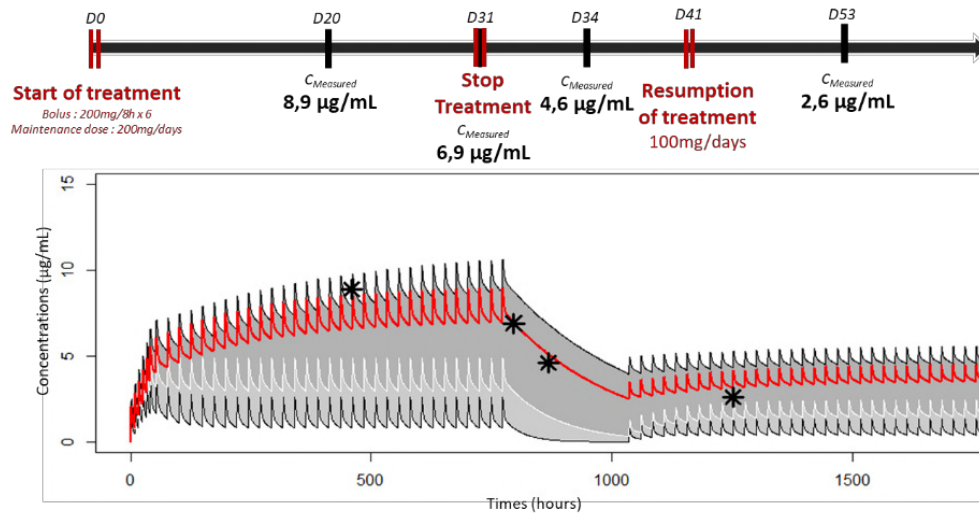

Fig. 3

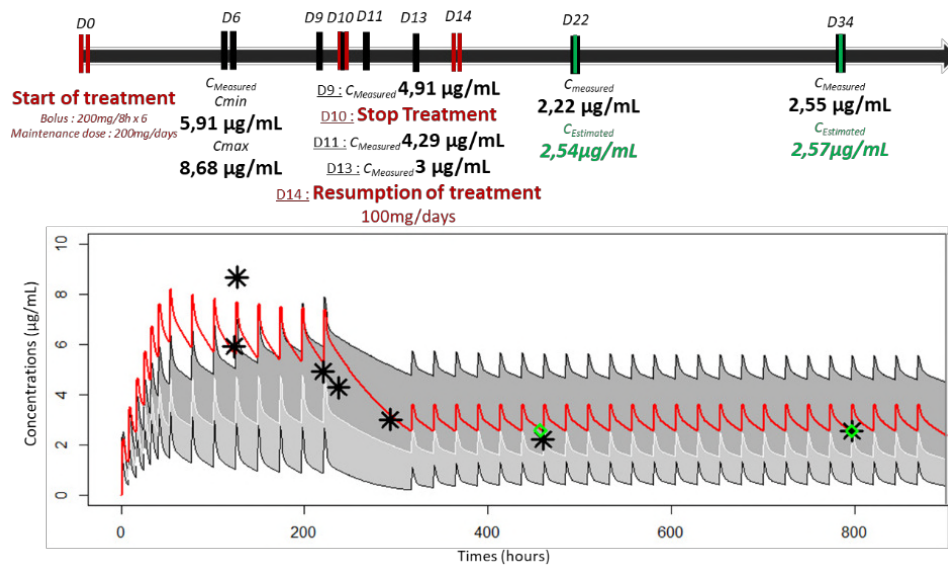

Fig. 4

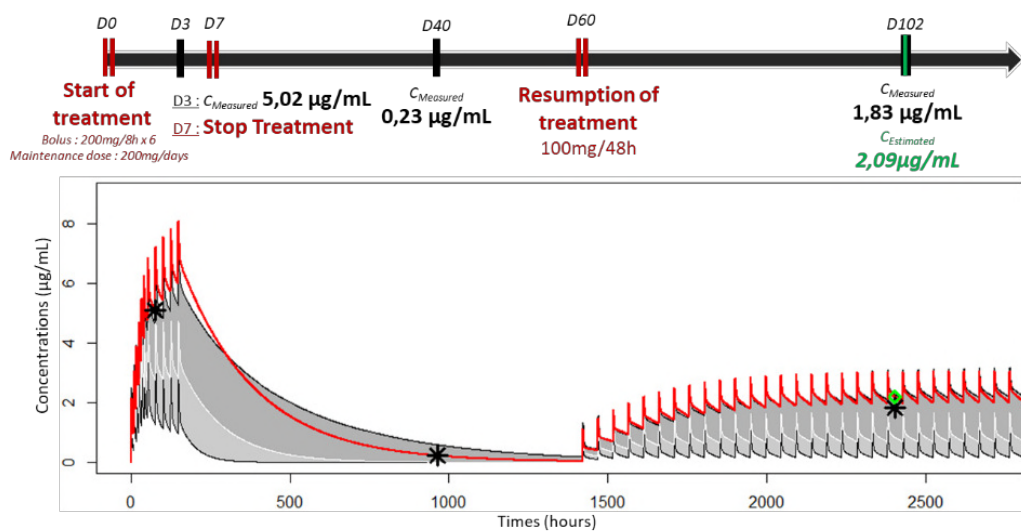

Source: https://www.biorxiv.org/content/10.1101/316851v1.full.pdf
